# Supplementary material
Source: Springer Nature journal article supplement (https://www.springermedizin.de/resource/supplementary/13075_2012_3624_MOESM7_ESM.pdf/9694912)

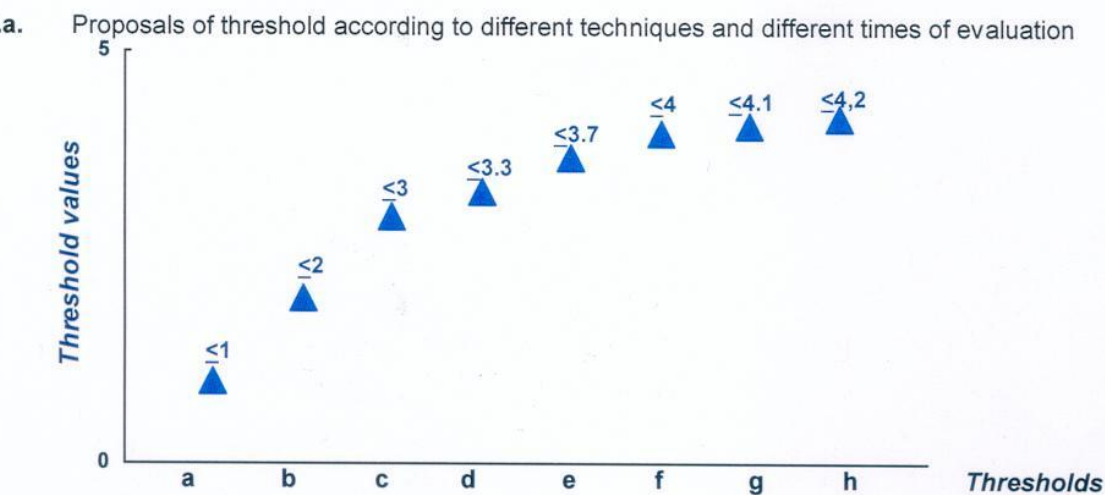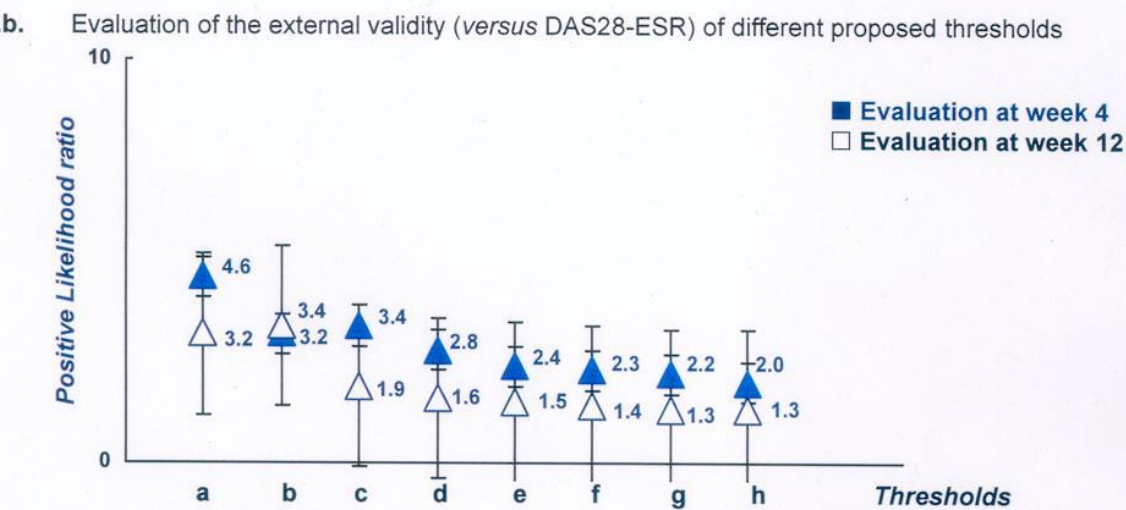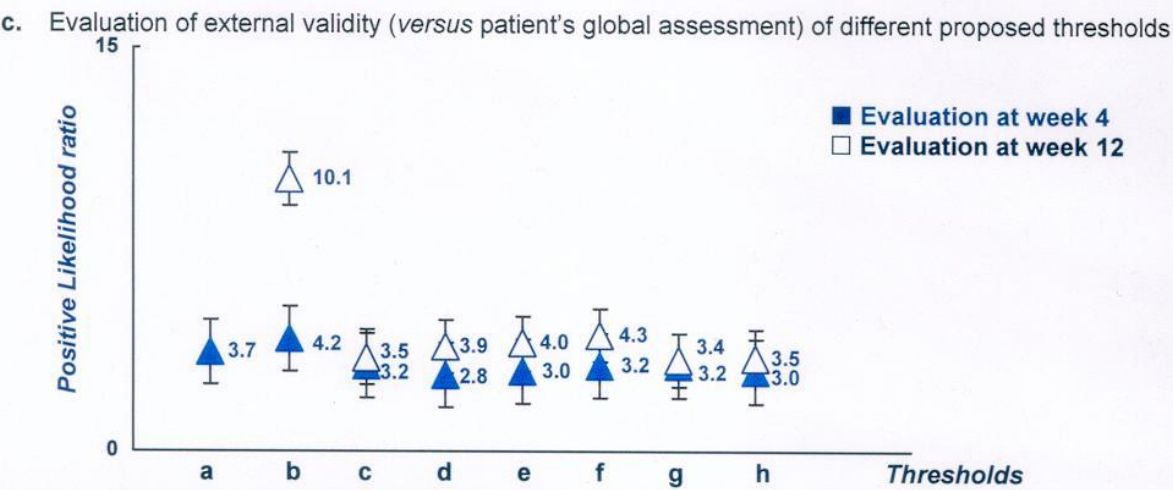

Supplement: MOESM7 [file 9694912]
